# Supplementary material for: Multiplexed Spatial Profiling of Hodgkin Reed–Sternberg Cell Neighborhoods in Classic Hodgkin Lymphoma
Source: PubMed Central journal article supplement — Clin Cancer Res. 2024 Jul 1;30(17):3881–93. doi: 10.1158/1078-0432.CCR-24-0942 (PMC11369618; doi:10.1158/1078-0432.ccr-24-0942), 2024-07-01
Supplement: ccr-24-0942_supplementary_figure_s1_suppsf1.pdf [file ccr-24-0942_supplementary_figure_s1_suppsf1.pdf]

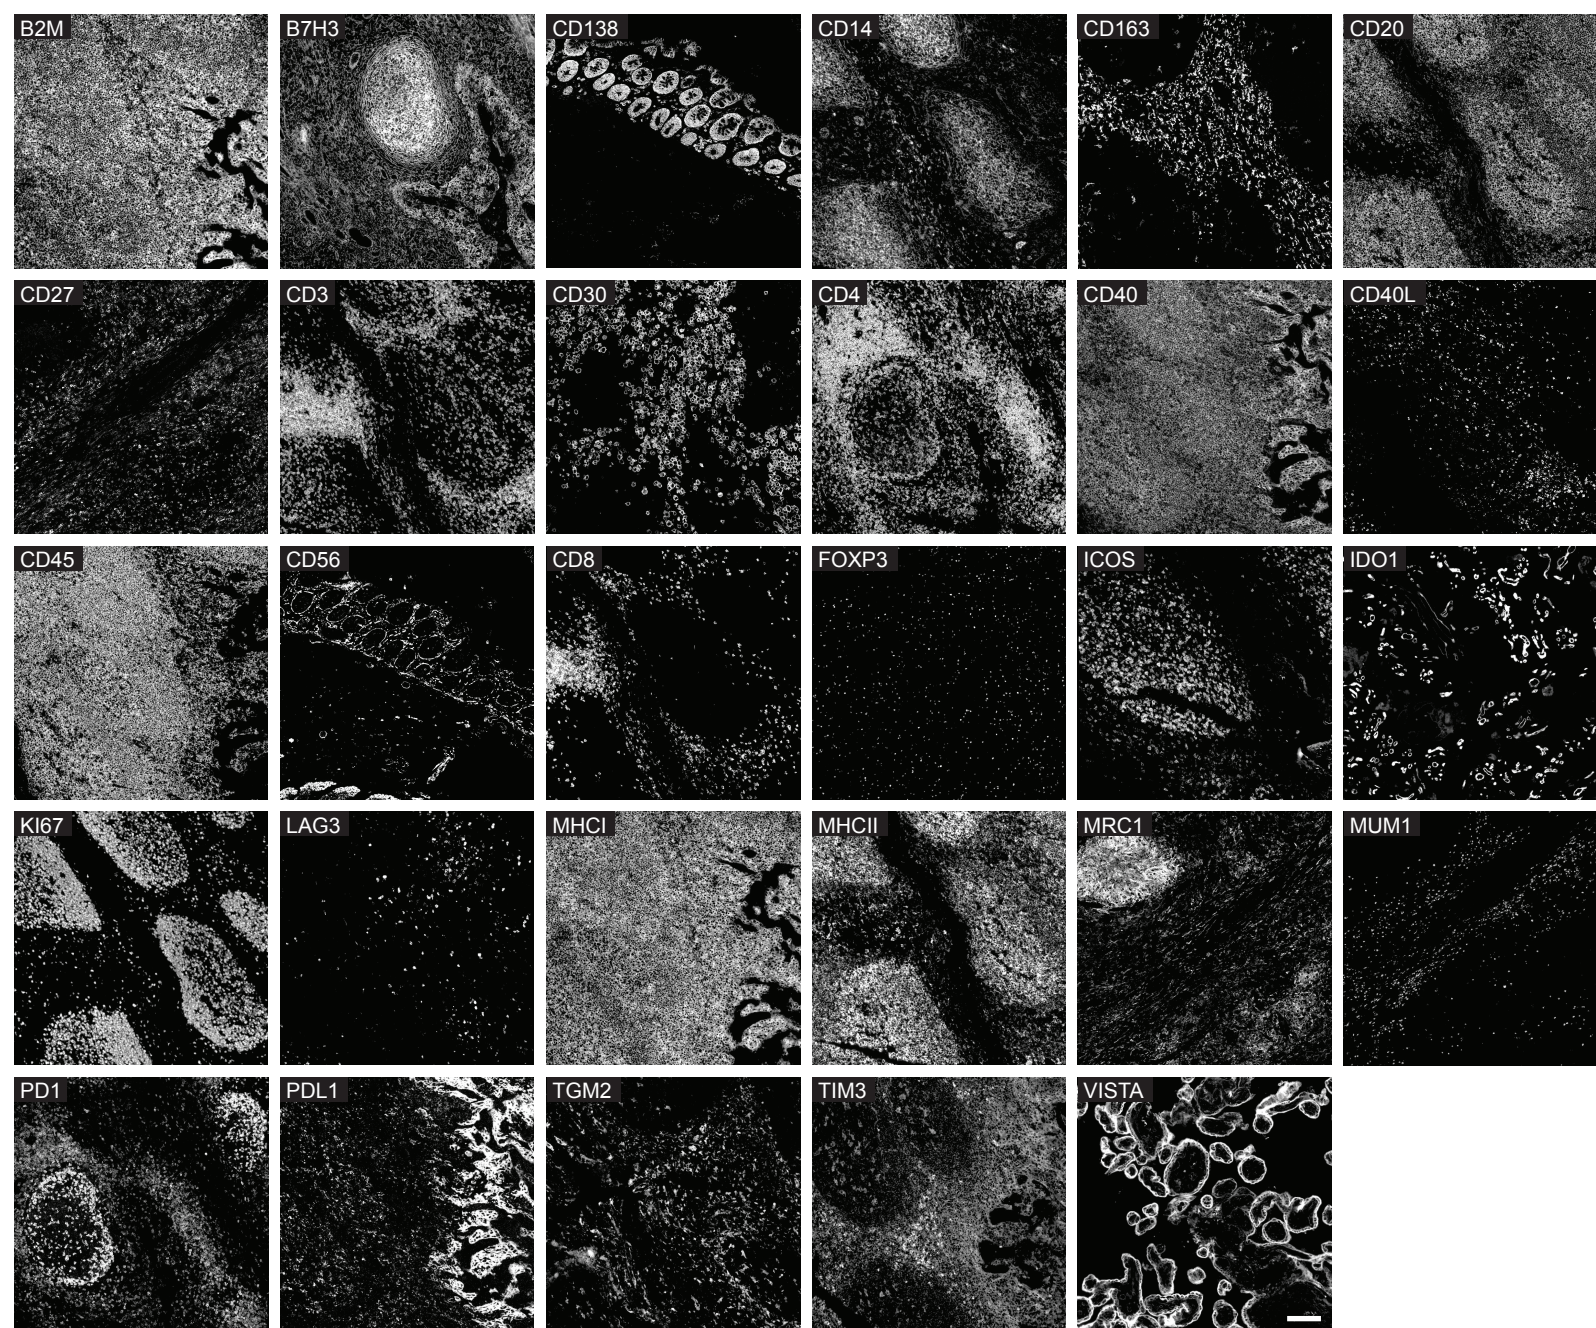

**Supplementary Fig. S1. Validation of mpIF antibody panel.** Representative immunofluorescence images at the optimal multiplexed immunofluorescence (mpIF) staining concentration used for each direct conjugate in normal human tissue. Tonsil: B2M, B7-H3, CD14, CD163, CD20, CD27, CD3, CD4, CD40, CD40L, CD45, CD8, FOXP3, ICOS, KI-67, LAG-3, MHC-I, MHC-II, MRC1, MUM-1, PD-1, PD-L1, TGM2, TIM-3. Colon: CD138, CD56. Classic Hodgkin lymphoma: CD30. Placenta: IDO-1, VISTA. Scale bar, 100-microns.
