# Supplementary material for: Multiplexed Spatial Profiling of Hodgkin Reed–Sternberg Cell Neighborhoods in Classic Hodgkin Lymphoma
Source: PubMed Central journal article supplement — Clin Cancer Res. 2024 Jul 1;30(17):3881–93. doi: 10.1158/1078-0432.CCR-24-0942 (PMC11369618; doi:10.1158/1078-0432.ccr-24-0942), 2024-07-01
Supplement: ccr-24-0942_supplementary_figure_s2_suppsf2.pdf [file ccr-24-0942_supplementary_figure_s2_suppsf2.pdf]

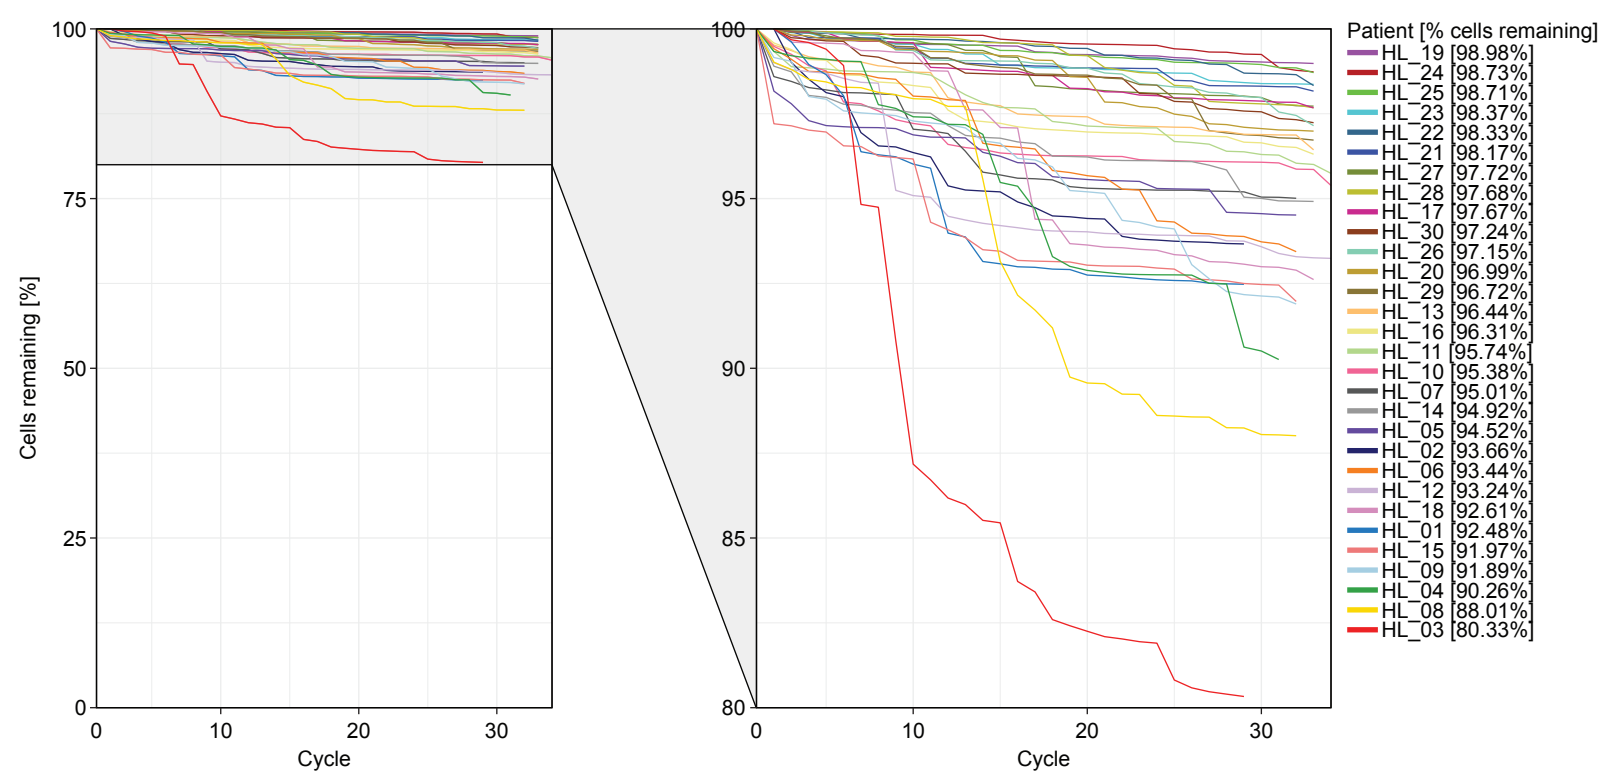

**Supplementary Fig. S2. Tracking of cell loss across staining cycles.** Percent of cells remaining for each patient following each cycle of staining and signal inactivation. See also **Supplementary Table S5**.
