# Supplementary material for: Multiplexed Spatial Profiling of Hodgkin Reed–Sternberg Cell Neighborhoods in Classic Hodgkin Lymphoma
Source: PubMed Central journal article supplement — Clin Cancer Res. 2024 Jul 1;30(17):3881–93. doi: 10.1158/1078-0432.CCR-24-0942 (PMC11369618; doi:10.1158/1078-0432.ccr-24-0942), 2024-07-01
Supplement: ccr-24-0942_supplementary_figure_s3_suppsf3.pdf [file ccr-24-0942_supplementary_figure_s3_suppsf3.pdf]

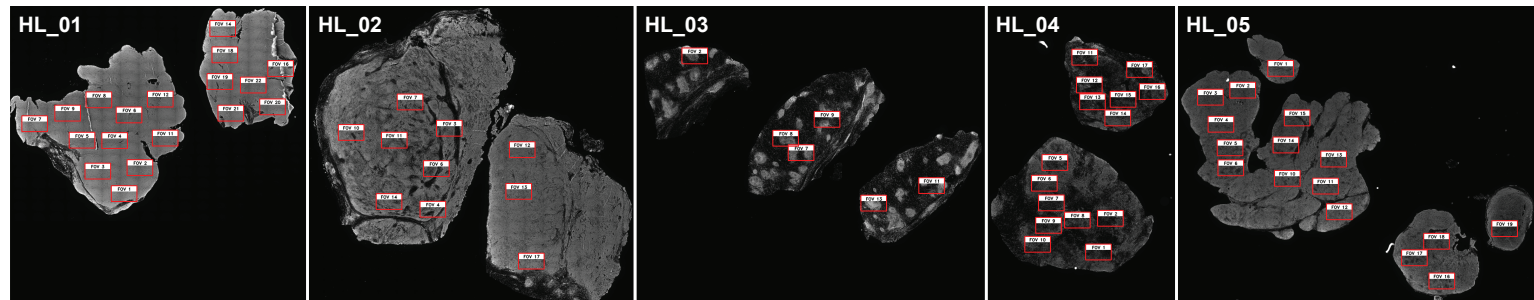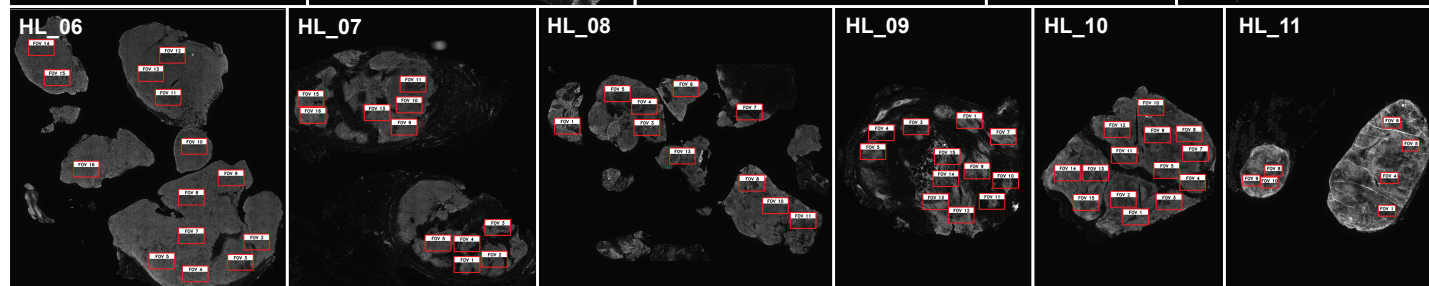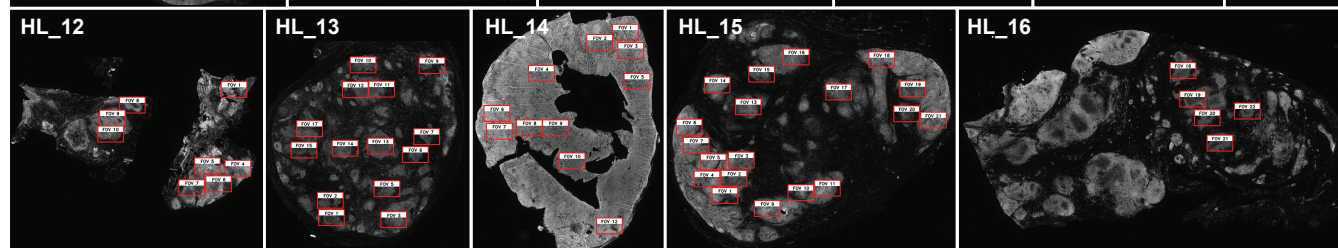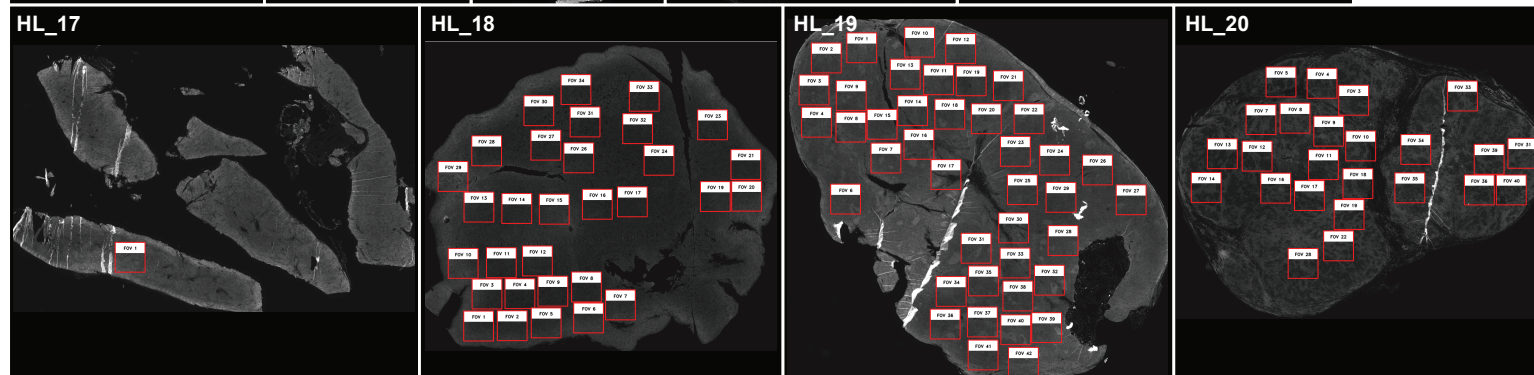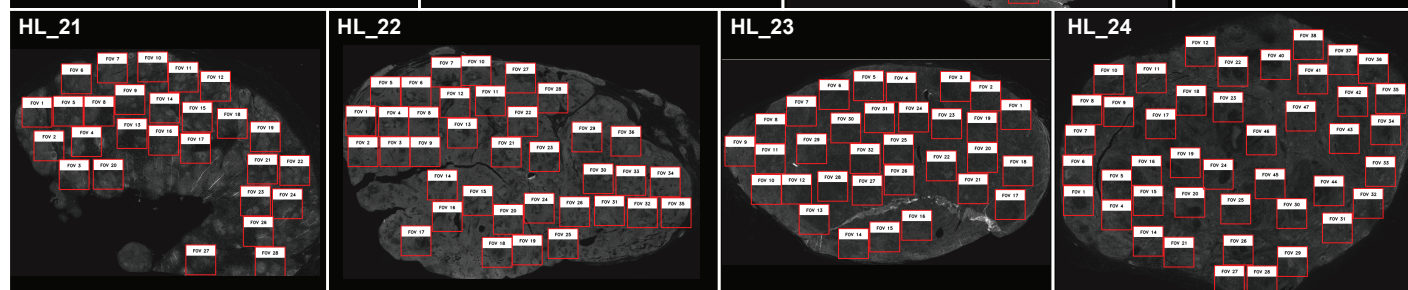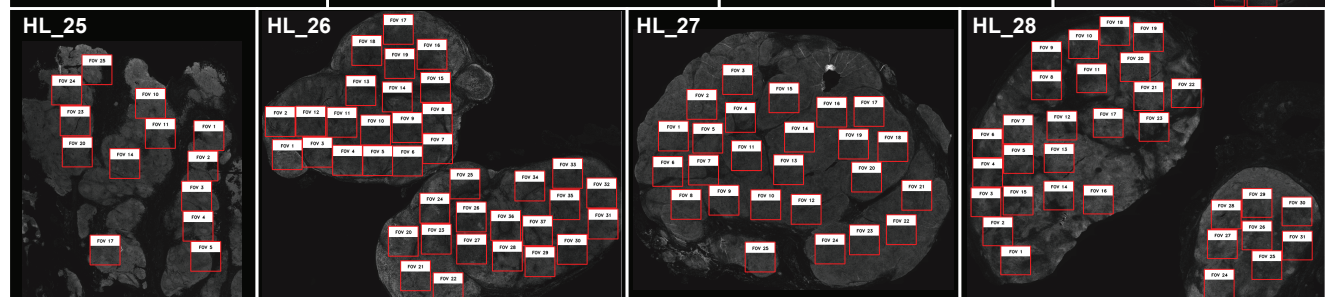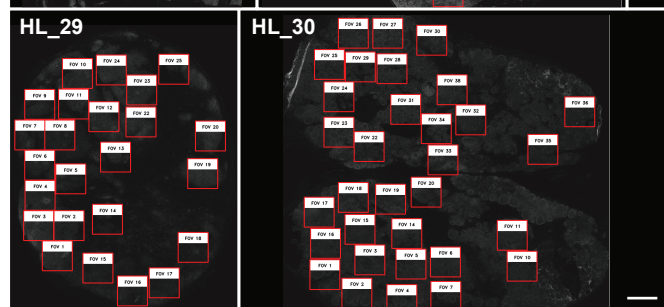

**Supplementary Fig. S3. FOV placement for mpIF.** Location of each field of view (FOV) in all tumors profiled using multiplexed immunofluorescence (mpIF). Scale bar, 2 millimeters. See also **Supplementary Table S5**.
