# Supplementary material for: Multiplexed Spatial Profiling of Hodgkin Reed–Sternberg Cell Neighborhoods in Classic Hodgkin Lymphoma
Source: PubMed Central journal article supplement — Clin Cancer Res. 2024 Jul 1;30(17):3881–93. doi: 10.1158/1078-0432.CCR-24-0942 (PMC11369618; doi:10.1158/1078-0432.ccr-24-0942), 2024-07-01
Supplement: ccr-24-0942_supplementary_figure_s6_suppsf6.pdf [file ccr-24-0942_supplementary_figure_s6_suppsf6.pdf]

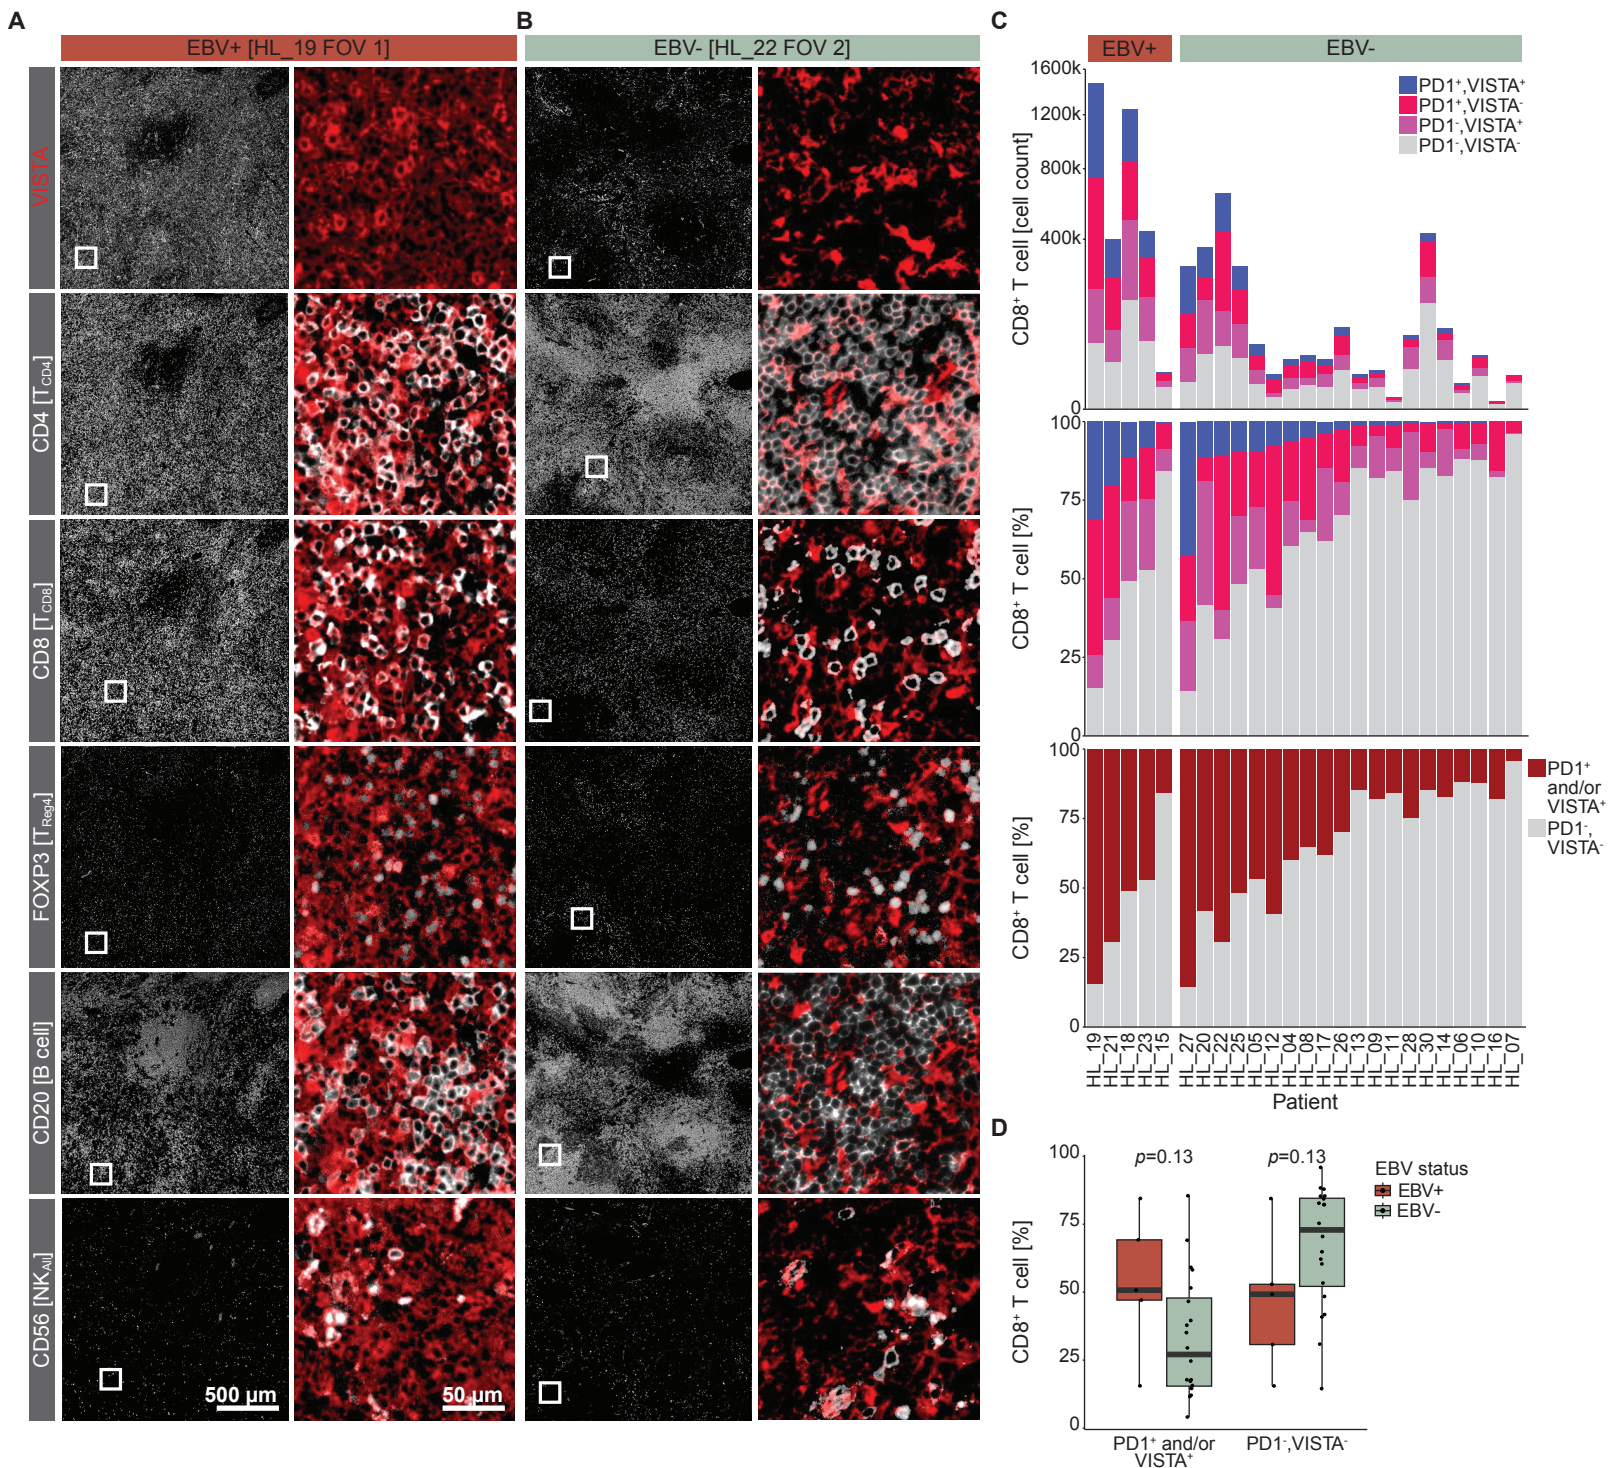

**Supplementary Fig. S6. EBV-positive tumors exhibit increased expression of VISTA.** **A**, Representative field of view (FOV) from an Epstein-Barr virus (EBV) positive and **B**, EBV-negative tumor showing staining for VISTA, CD4 (representing CD4<sup>+</sup> T cells), CD8 (representing CD8<sup>+</sup> T cells), FOXP3 (representing CD4<sup>+</sup> regulatory T cells), CD20 (representing B cells), and CD56 (representing all natural killer, NK, cells). First and third columns show the single stain (white) and second and fourth columns show a magnified region of the FOV overlaying VISTA (red) and the respective marker (white). **C**, The bar plots indicate the cell count and percentage of CD8<sup>+</sup> T cells that are positive for all combinations of PD1 and VISTA. **D**, The box plot displays (minimum, first quartile, median, third quartile, and maximum) the percent of CD8<sup>+</sup> T cells that are positive for PD1 and/or VISTA or negative for both PD1 and VISTA for EBV-positive (n=5) and EBV-negative (n=20) tumors (two-sided Wilcoxon test).
