# Supplementary material for: Multiplexed Spatial Profiling of Hodgkin Reed–Sternberg Cell Neighborhoods in Classic Hodgkin Lymphoma
Source: PubMed Central journal article supplement — Clin Cancer Res. 2024 Jul 1;30(17):3881–93. doi: 10.1158/1078-0432.CCR-24-0942 (PMC11369618; doi:10.1158/1078-0432.ccr-24-0942), 2024-07-01
Supplement: ccr-24-0942_supplementary_figure_s7_suppsf7.pdf [file ccr-24-0942_supplementary_figure_s7_suppsf7.pdf]

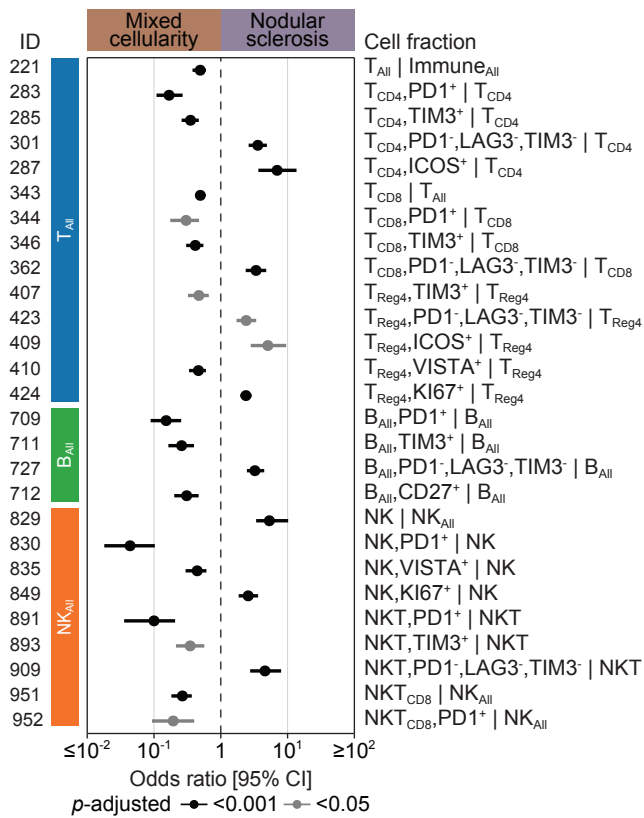

**Supplementary Fig. S7. EBV-positive MC tumors contain a T cell rich activated TME.** Forest plot indicating effect size and 95% confidence interval (CI) of statistically and biologically significant (see Methods) immune cell fractions colored by p-adjusted (two-sided Wilcoxon test adjusted by Bonferroni correction) in the comparison of Epstein-Barr virus (EBV) positive nodular sclerosis (NS) (n=72 fields of view, FOVs) and EBV-positive mixed cellularity (MC) (n=78 FOVs) tumors. For cell type abbreviations, see **Supplementary Table S3**. For exact p-values, see **Supplementary Table S9**.
