# Supplementary material for: Multiplexed Spatial Profiling of Hodgkin Reed–Sternberg Cell Neighborhoods in Classic Hodgkin Lymphoma
Source: PubMed Central journal article supplement — Clin Cancer Res. 2024 Jul 1;30(17):3881–93. doi: 10.1158/1078-0432.CCR-24-0942 (PMC11369618; doi:10.1158/1078-0432.ccr-24-0942), 2024-07-01
Supplement: ccr-24-0942_supplementary_figure_s8_suppsf8.pdf [file ccr-24-0942_supplementary_figure_s8_suppsf8.pdf]

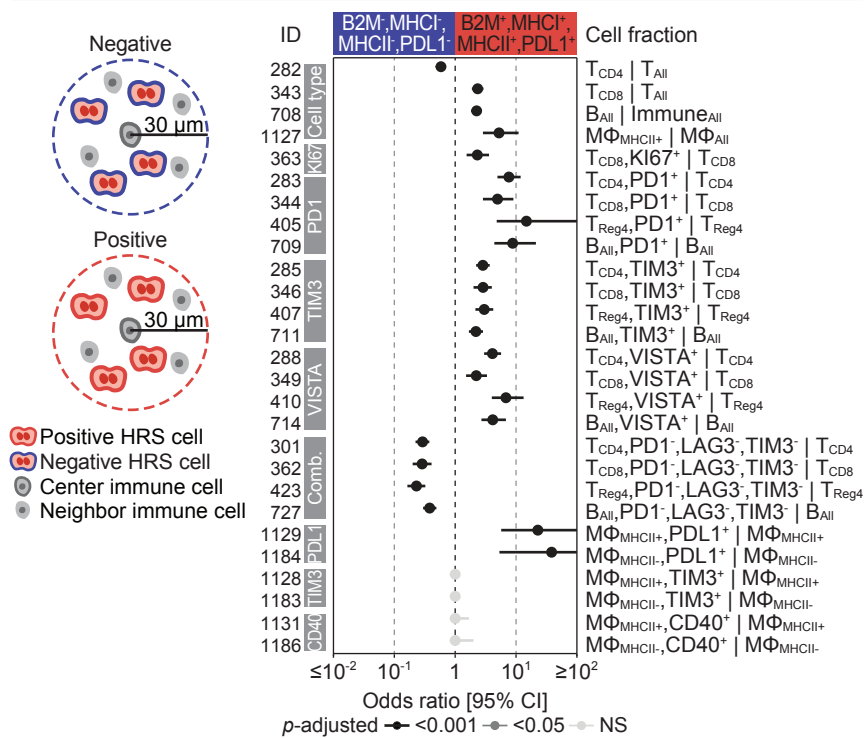

**Supplementary Fig. S8. B2M/MHCI/MHCII/PDL1-related HRS cell neighborhoods.** Analysis approach to defining B2M, MHC-I, MHC-II, and PD-L1 positive and negative Hodgkin Reed-Sternberg (HRS) cell neighborhoods. The forest plot shows effect size and 95% confidence interval (CI) of immune cell fractions colored by p-adjusted (two-sided Wilcoxon test adjusted by Bonferroni correction) in the comparison of B2M<sup>+</sup>/MHC-I<sup>+</sup>/MHC-II<sup>+</sup>/PD-L1<sup>+</sup> and B2M<sup>-</sup>/MHC-I<sup>-</sup>/MHC-II<sup>-</sup>/PD-L1<sup>-</sup> HRS neighborhoods in Epstein-Barr virus (EBV) negative tumors. For cell type abbreviations, see **Supplementary Table S3**. For exact p-values, see **Supplementary Table S10**.
