# Supplementary material for: Multiplexed Spatial Profiling of Hodgkin Reed–Sternberg Cell Neighborhoods in Classic Hodgkin Lymphoma
Source: PubMed Central journal article supplement — Clin Cancer Res. 2024 Jul 1;30(17):3881–93. doi: 10.1158/1078-0432.CCR-24-0942 (PMC11369618; doi:10.1158/1078-0432.ccr-24-0942), 2024-07-01
Supplement: ccr-24-0942_supplementary_figure_s10_suppsf10.pdf [file ccr-24-0942_supplementary_figure_s10_suppsf10.pdf]

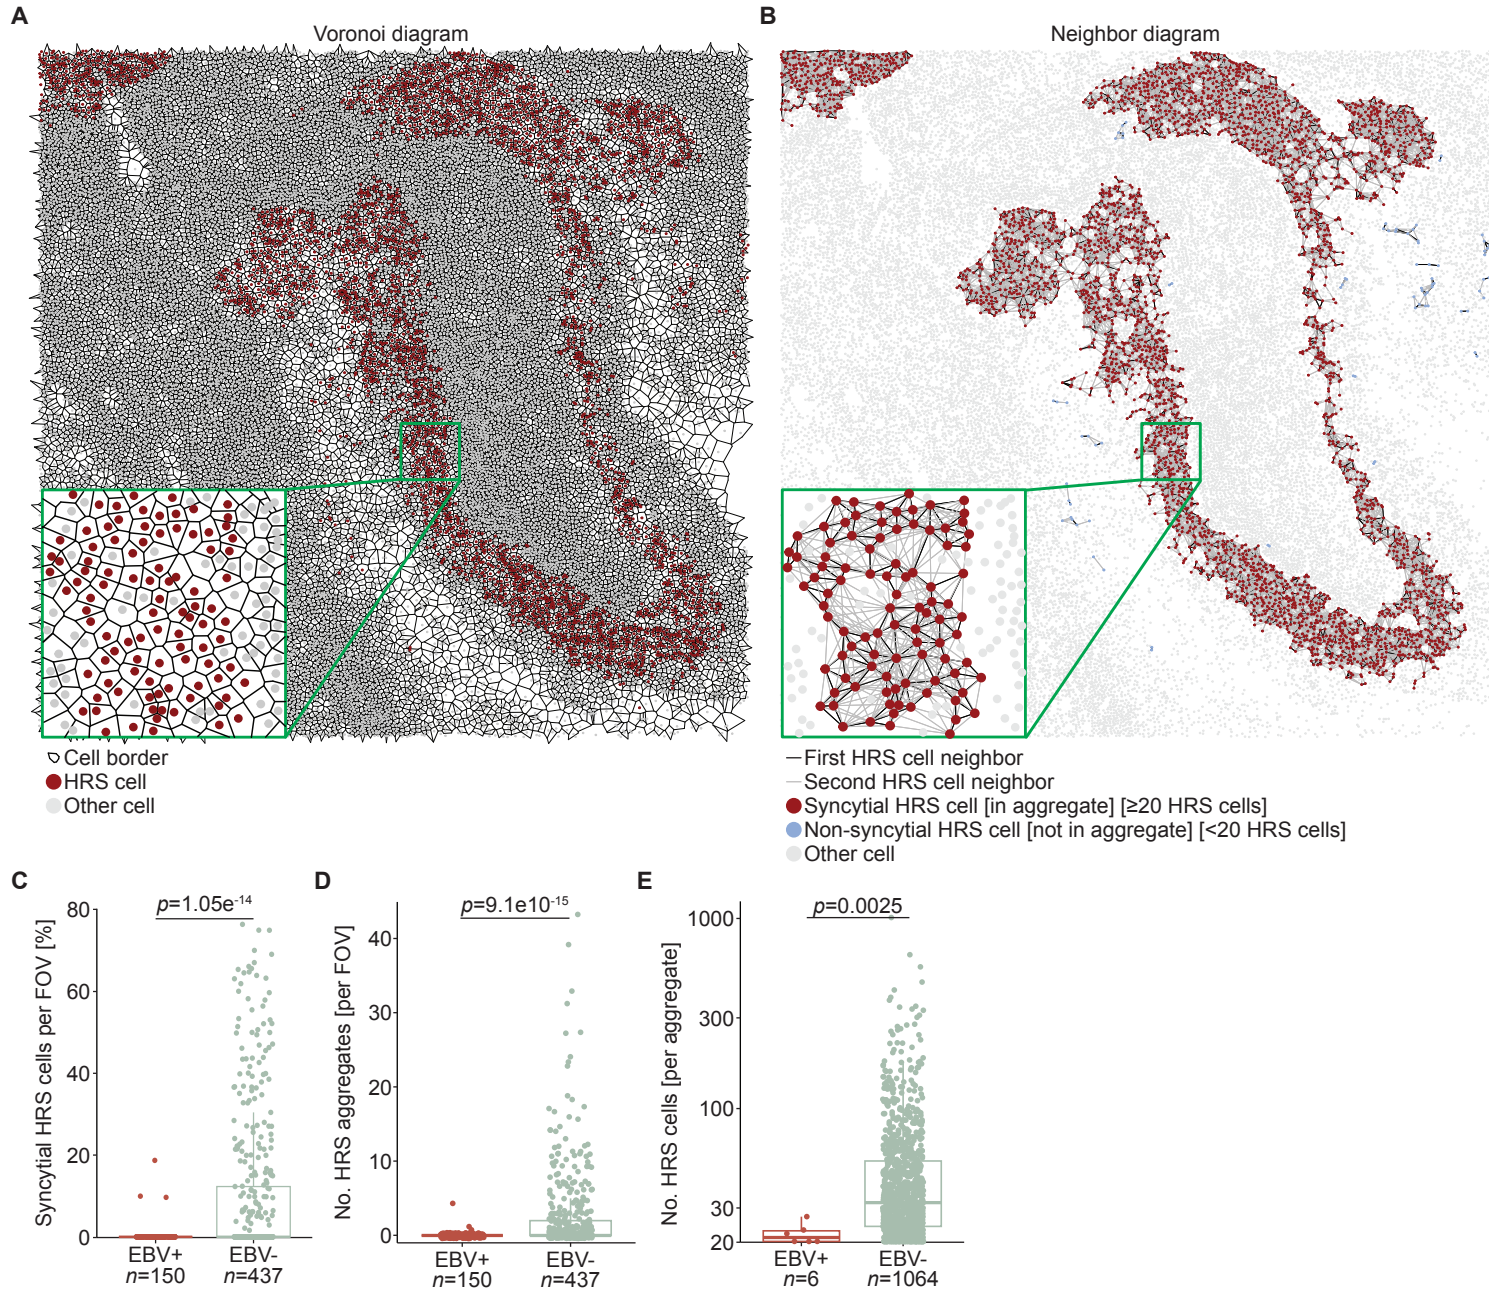

**Supplementary Fig. S10. Quantification of HRS cell patterns of spatial organization.** **A**, Voronoi diagram of a field of view (FOV). Each polygon corresponds to a cell in the multiplexed immunofluorescence image where the point (nucleus) is closest to the centroid of its cell than any other cell. The polygon borders indicate adjacencies between cells (nearest geometric neighbor). **B**, Neighbor diagram for Hodgkin Reed-Sternberg (HRS) cells. **C**, Box plots indicating (minimum, first quartile, median, third quartile, and maximum) percent of syncytial HRS cells, **D**, number of HRS aggregates per FOV, and **E**, size of HRS aggregates (two-sided Wilcoxon test). See also **Supplementary Table S12**.
