# Supplementary material for: Multiplexed Spatial Profiling of Hodgkin Reed–Sternberg Cell Neighborhoods in Classic Hodgkin Lymphoma
Source: PubMed Central journal article supplement — Clin Cancer Res. 2024 Jul 1;30(17):3881–93. doi: 10.1158/1078-0432.CCR-24-0942 (PMC11369618; doi:10.1158/1078-0432.ccr-24-0942), 2024-07-01
Supplement: ccr-24-0942_supplementary_figure_s11_suppsf11.pdf [file ccr-24-0942_supplementary_figure_s11_suppsf11.pdf]

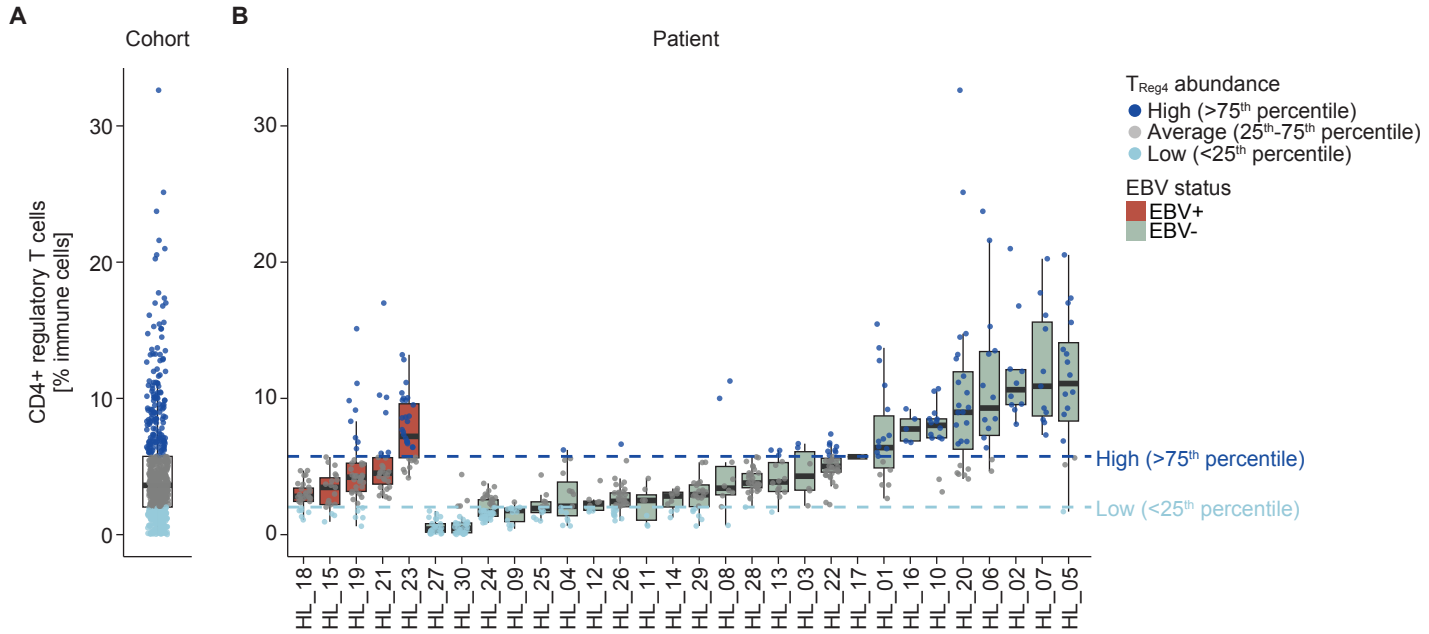

**Supplementary Fig. S11. Intertumoral heterogeneity in regulatory T cell abundance.** **A**, Box plots indicating (minimum, first quartile, median, third quartile, and maximum) the percent of CD4+ regulatory T cells over immune cells for each field of view (FOV) in the cohort (n=587) and **B**, for each patient grouped by Epstein-Barr virus (EBV) status.
