# Supplementary figures and images for: Multiplexed Spatial Profiling of Hodgkin Reed–Sternberg Cell Neighborhoods in Classic Hodgkin Lymphoma
Source: PubMed Central journal article supplement — Clin Cancer Res. 2024 Jul 1;30(17):3881–93. doi: 10.1158/1078-0432.CCR-24-0942 (PMC11369618; doi:10.1158/1078-0432.ccr-24-0942), 2024-07-01

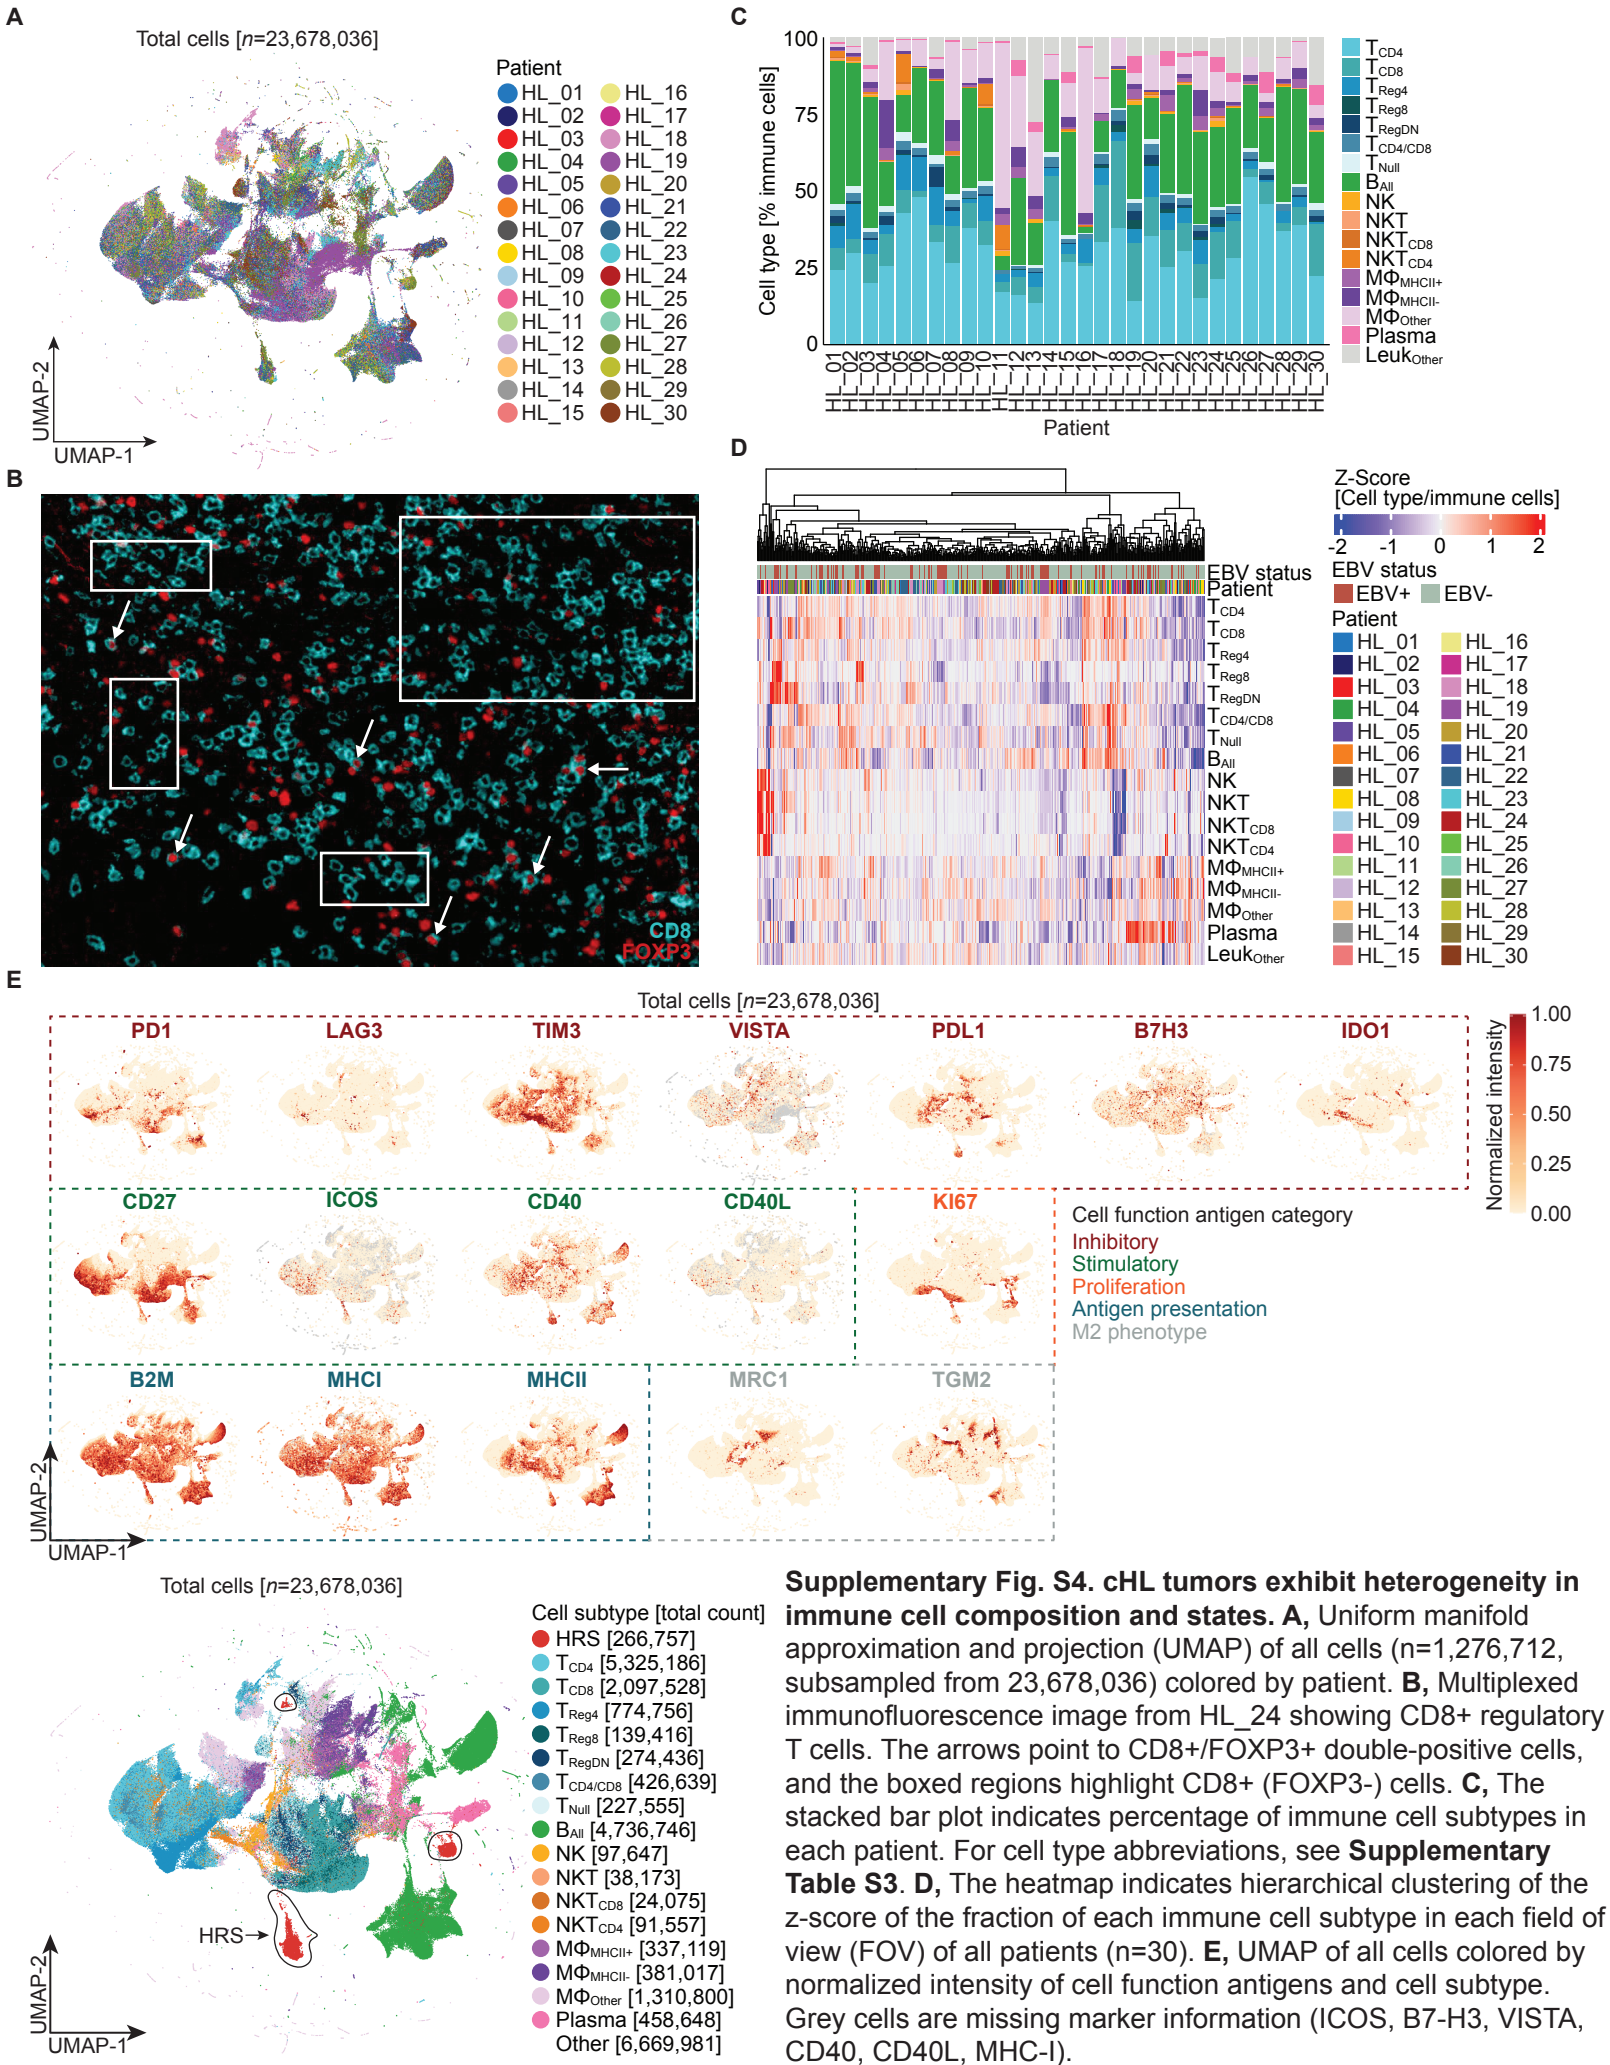

Supplement: ccr-24-0942_supplementary_figure_s4_suppsf4.pdf [file ccr-24-0942_supplementary_figure_s4_suppsf4.pdf]
